# Supplementary material for: As above, so below: Deposition, modification, and reutilization of human remains at Marmoles cave (Cueva de los Marmoles: Southern Spain, 4000–1000 cal. BCE)
Source: PLoS One. 2023 Sep 20;18(9):e0291152. doi: 10.1371/journal.pone.0291152 (PMC10511113; doi:10.1371/journal.pone.0291152)
Supplement: S5 Table — f: fresh fractures; c: cut marks; ch: chop marks; malt: medullary cavity alteration; L: left; R: right. (XLSX) [file pone.0291152.s009.xlsx]

## Sheet: S5 Table
				Adults						Nonadults
		Bone	Side	MNE	MNEf(%)	MNEc(%)	MNEch(%)	MNEmalt(%)	MNE	MNEf(%)	MNEc(%)	MNEch(%)	MNEmalt(%)
		Cranium		6	4 (66.7)	1(16.7)	0 (0.0)	0 (0.0)	2	1 (50.0)	0 (0.0)	0 (0.0)	0 (0.0)
		Mandible		5	2 (40.0)	0 (0.0)	0 (0.0)	0 (0.0)	1	0 (0.0)	0 (0.0)	0 (0.0)	0 (0.0)
		Atlas		1	0 (0.0)	0 (0.0)	0 (0.0)	0 (0.0)	1	0 (0.0)	0 (0.0)	0 (0.0)	0 (0.0)
		Axis		1	0 (0.0)	0 (0.0)	0 (0.0)	0 (0.0)	1	0 (0.0)	0 (0.0)	0 (0.0)	0 (0.0)
		Metacarpals	L	2	0 (0.0)	0 (0.0)	0 (0.0)	0 (0.0)	0	0	0	0	0
		Metacarpals	R	1	0 (0.0)	0 (0.0)	0 (0.0)	0 (0.0)	0	0	0	0	0
		Metatarsal	L	1	0 (0.0)	0 (0.0)	0 (0.0)	0 (0.0)	1	0 (0.0)	0 (0.0)	0 (0.0)	0 (0.0)
		Metatarsal	R	1	0 (0.0)	0 (0.0)	0 (0.0)	0 (0.0)	0	0	0	0
		Os coxae	L	3	1 (33.3)	0 (0.0)	0 (0.0)	0 (0.0)	1	1 (100.0)	0 (0.0)	0 (0.0)	0 (0.0)
		Os coxae	R	5	2 (40.0)	0 (0.0)	0 (0.0)	0 (0.0)	2	0 (0.0)	0 (0.0)	1 (50.0)	0 (0.0)
		Sacrum		7	0 (0.0)	0 (0.0)	0 (0.0)	0 (0.0)	1	0 (0.0)	0 (0.0)	0 (0.0)	0 (0.0)
		Fibula	L	3	0 (0.0)	0 (0.0)	0 (0.0)	0 (0.0)	0	0	0	0	0
		Fibula	R	6	4 (66.7)	0 (0.0)	0 (0.0)	0 (0.0)	1	1 (100.0)	0 (0.0)	0 (0.0)	0 (0.0)
		Calcaneus	L	2	0 (0.0)	0 (0.0)	0 (0.0)	0 (0.0)	1	0 (0.0)	0 (0.0)	0 (0.0)	0 (0.0)
		Calcaneus	R	1	0 (0.0)	0 (0.0)	0 (0.0)	0 (0.0)	0	0	0	0	0
		Talus	L	2	0 (0.0)	0 (0.0)	0 (0.0)	0 (0.0)	0	0	0	0	0
		Talus	R	0	0	0	0	0	0	0	0	0	0
		Tibia	L	3	1 (33.3)	0 (0.0)	0 (0.0)	0 (0.0)	4	0 (0.0)	0 (0.0)	0 (0.0)	0 (0.0)
		Tibia	R	7	5 (71.4)	0 (0.0)	0 (0.0)	3(42.9)	3	1(33.3)	0 (0.0)	1(33.3)	1(33.3)
		Radius	L	2	1 (50.0)	0 (0.0)	0 (0.0)	0 (0.0)	0	0	0	0	0
		Radius	R	5	1 (20.0)	0 (0.0)	0 (0.0)	0 (0.0)	0	0	0	0	0
		Ulna	L	6	1 (16.7)	0 (0.0)	0 (0.0)	0 (0.0)	0	0	0	0	0
		Ulna	R	2	0 (0.0)	0 (0.0)	0 (0.0)	0 (0.0)	1	0 (0.0)	0 (0.0)	0 (0.0)	0 (0.0)
		Humerus	L	6	2 (33.3)	0 (0.0)	1 (16.7)	1 (16.7)	4	0 (0.0)	0 (0.0)	0 (0.0)	0 (0.0)
		Humerus	R	7	4 (57.1)	0 (0.0)	0 (0.0)	1(14.3)	4	1(25.0)	1(25.0)	0 (0.0)	0 (0.0)
		Scapula	L	4	2 (50.0)	0 (0.0)	0 (0.0)	0 (0.0)	1	1 (100.0)	0 (0.0)	0 (0.0)	0 (0.0)
		Scapula	R	5	1 (20.0)	0 (0.0)	0 (0.0)	0 (0.0)	0	0	0	0	0
		Femur	L	5	3 (60.0)	1 (20.0)	0 (0.0)	1(20.0)	5	2 (40.0)	0 (0.0)	1 (20.0)	0 (0.0)
		Femur	R	5	2 (40.0)	0 (0.0)	0 (0.0)	1(20.0)	2	0 (0.0)	0 (0.0)	0 (0.0)	0 (0.0)
		Clavicle	L	3	1 (33.3)	0 (0.0)	0 (0.0)	0 (0.0)	0	0	0	0	0
		Clavicle	R	1	0 (0.0)	0 (0.0)	0 (0.0)	0 (0.0)	2	0 (0.0)	0 (0.0)	0 (0.0)	0 (0.0)
		MNI		7	5 (71.4)*	1 (14.3)*	1 (14.3)*	3(42.9)*	5	2 (40.0)*	1 (20.0)*	1 (20.0)*	1 (20.0)*
		Adult fibular fragment MR-18-Z134 (unsided): one cutmark present (not inlcuded in calculation due to missing landmarks)
